# Supplementary material for: Primary succession and its driving variables – a sphere-spanning approach applied in proglacial areas in the upper Martell Valley (Eastern Italian Alps)
Source: Copernicus journal article supplement (doi:10.5194/bg-20-2919-2023), 2023-07-21
Supplement: Supplementary file 1 [file bg-20-2919-2023-supplement.pdf]

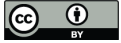

*Supplement of*

**Primary succession and its driving variables – a sphere-spanning approach applied in proglacial areas in the upper Martell Valley (Eastern Italian Alps)**

**Katharina Ramskogler et al.**

*Correspondence to:* Katharina Ramskogler (katharina.ramskogler@eurac.edu) and Bettina Knoflach (bettina.knoflach@uibk.ac.at)

The copyright of individual parts of the supplement might differ from the article licence.

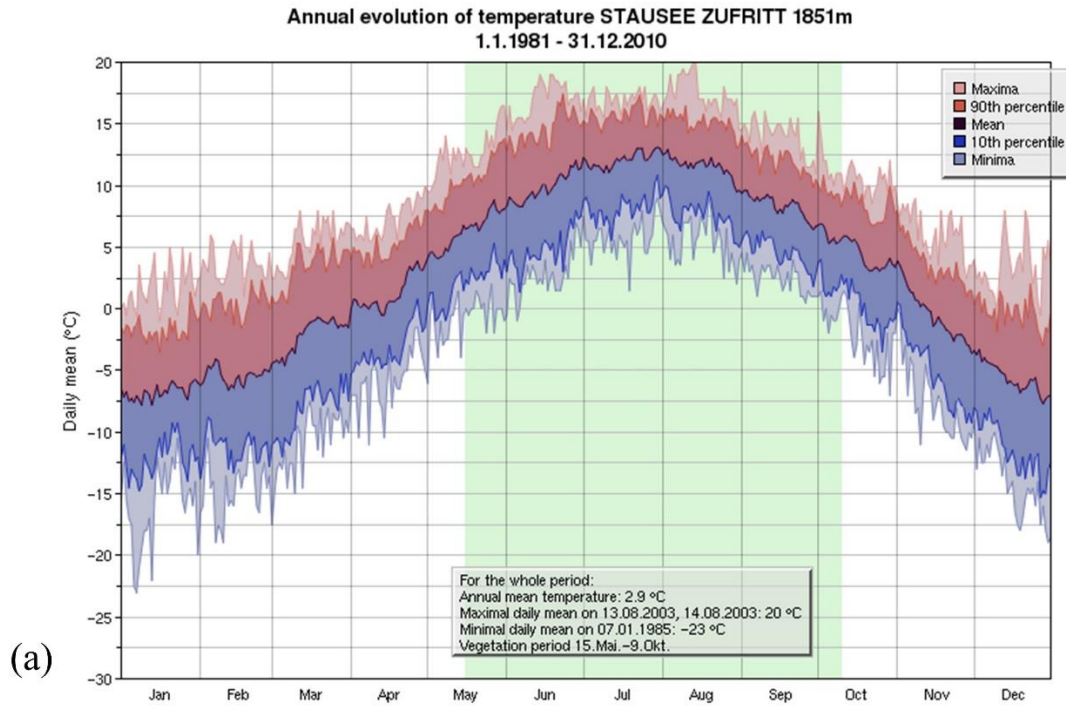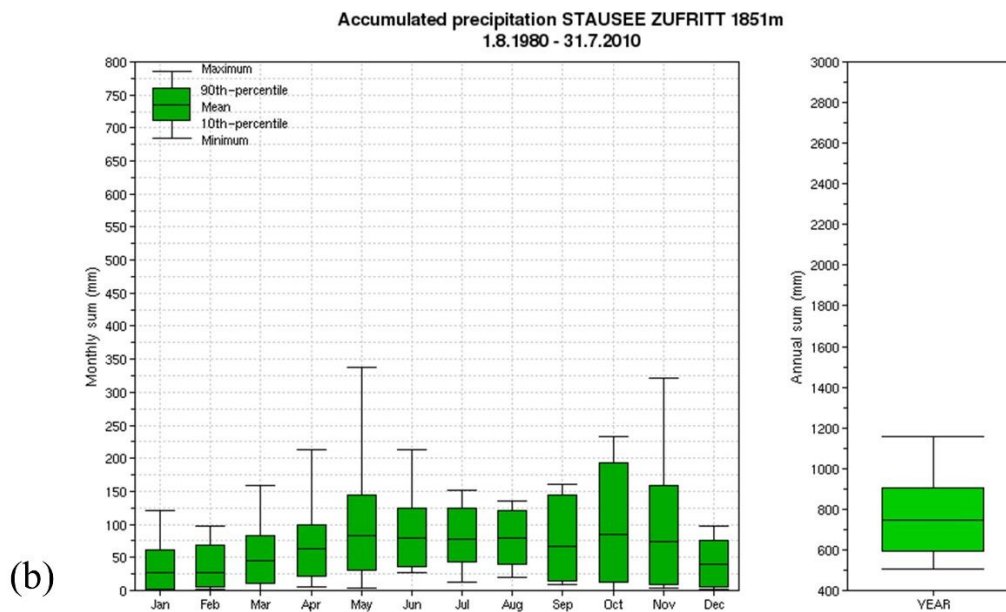

**Figure S1: (a) Annual distribution of the temperature with the daily mean temperature [°C] and (b) accumulated precipitation with the monthly and annual sum [mm] at lake Zufritt (1851 m a.s.l.) for the 30-year climate period 1981 to 2010 and 1980 to 2010 respectively (graphs from the 3PCLIM-project; source: [www.3pclim.eu](http://www.3pclim.eu); accessed on 29.04.2023).**

Table S1: List of the literature review with the author(s), publication year, title, journal, and location of the study.

| Author                | Year | Title                                                                                                                                                                                                                       | Journal                                   | Location      |
|-----------------------|------|-----------------------------------------------------------------------------------------------------------------------------------------------------------------------------------------------------------------------------|-------------------------------------------|---------------|
| Haselberger et al.    | 2021 | Quantification of biogeomorphic interactions between small-scale sediment transport and primary vegetation succession on proglacial slopes of the Gepatschferner, Austria                                                   | Earth Surface Processes and Landforms     | European Alps |
| Knoflach et al.       | 2021 | Modelling of Vegetation Dynamics from Satellite Time Series to Determine Proglacial Primary Succession in the Course of Global Warming—A Case Study in the Upper Martell Valley (Eastern Italian Alps)                      | Remote Sensing                            | European Alps |
| Losapio et al.        | 2021 | The consequences of glacier retreat are uneven between plant species                                                                                                                                                        | frontiers in Ecology and Evolution        | European Alps |
| Wei et al.            | 2021 | Characteristics and controls of vegetation and diversity changes monitored with an unmanned aerial vehicle (UAV) in the foreland of the Urumqi Glacier No. 1, Tianshan, China                                               | Science of the Total Environment          | Asia          |
| Wietrzyk-Pełka et al. | 2021 | Patterns and drivers of cryptogam and vascular plant diversity in glacier forelands                                                                                                                                         | Science of the Total Environment          | Scandinavia   |
| Wojcik et al.         | 2021 | How allogenic factors affect succession in glacier forefields                                                                                                                                                               | Earth -Science Reviews                    |               |
| Llambi et al.         | 2021 | Vegetation Assembly, Adaptive Strategies and Positive Interactions During Primary Succession in the Forefield of the Last Venezuelan Glacier                                                                                | frontiers in Ecology and Evolution        | S-America     |
| Bayle                 | 2020 | A recent history of deglaciation and vegetation establishment in a contrasted geomorphological context, Glacier Blanc, French Alps                                                                                          | Journal of Maps                           | European Alps |
| Fickert               | 2020 | Common patterns and diverging trajectories in primary succession of plants in eastern alpine glacier forelands                                                                                                              | diversity                                 | European Alps |
| Lambert et al.        | 2020 | Vegetation change as related to terrain factors at two glacier forefronts, Glacier National Park, Montana, USA                                                                                                              | Journal of Mountain Science               | N-America     |
| Eichel                | 2019 | Vegetation succession and biogeomorphic interactions in glacier forelands                                                                                                                                                   | Book: Geomorphology of Proglacial Systems | European Alps |
| Fischer et al.        | 2019 | Vegetation dynamics in Alpine glacier forelands tackled from space                                                                                                                                                          | nature/scientific reports                 | European Alps |
| Franzén et al.        | 2019 | Rapid plant colonization of the forelands of a vanishing glacier is strongly associated with species traits                                                                                                                 | Arctic, Antarctic, and Alpine Research    | Scandinavia   |
| Szymański et al.      | 2019 | Impact of parent material, vegetation cover, and site wetness on variability of soil properties in proglacial areas of small glaciers along the northeastern coast of Sørkappland (SE Spitsbergen)                          | Catena                                    | Scandinavia   |
| Fickert & Grüninger   | 2018 | High-speed colonization of bare ground—Permanent plot studies on primary succession of plants in recently deglaciated glacier forelands                                                                                     | Land Degradation & Development            | European Alps |
| Wietrzyk et al.       | 2018 | The relationships between soil chemical properties and vegetation succession in the aspect of changes of distance from the glacier forehead and time elapsed after glacier retreat in the Irenebreen foreland (NW Svalbard) | Plant soil                                | Scandinavia   |

| Author                  | Year | Title                                                                                                                                                                                                   | Journal                                       | Location      |
|-------------------------|------|---------------------------------------------------------------------------------------------------------------------------------------------------------------------------------------------------------|-----------------------------------------------|---------------|
| Shahid & Mirza          | 2019 | An Analysis of Glacial Retreat and Resultant Vegetation Expansion in the Karakorum: A case study of Passu Glacier in Hunza valley                                                                       | Biologia (Pakistan)                           | Asia          |
| Cazzolla et al.         | 2018 | The last 50 years of climate-induced melting of Maliy Aktru glacier (Altai Mountains, Russia) revealed in a primary ecological succession                                                               | Ecology and Evolution                         | Asia          |
| Jinag et al.            | 2018 | Unravelling community assemblages through multi-element stoichiometry in plant leaves and roots across primary successional stages in a glacier retreat area                                            | Plant soil                                    | Asia          |
| D'Amico et al.          | 2017 | Primary vegetation succession and the serpentine syndrome: the proglacial area of the Verra Grande glacier, North-Western Italian Alps                                                                  | Plant soil                                    | European Alps |
| Fickert                 | 2017 | Glacier forelands-unique field laboratories for the study of primary succession of plants                                                                                                               | Glaciers Evolution in a Changing World (book) | European Alps |
| Fickert et al.          | 2017 | Klebelberg revisited: did primary succession of plants in glacier forelands a century ago differ from today?                                                                                            | Alpine Botany                                 | European Alps |
| Sitzia et al.           | 2017 | Landscape metrics as functional traits in plants: perspectives from a glacier foreland                                                                                                                  | PeerJ                                         | European Alps |
| Göransson et al.        | 2016 | Nitrogen and phosphorus availability at early stages of soil development in The Damma glacier forefield, Switzerland; implications for establishment of N <sub>2</sub> -fixing plants                   | Plant soil                                    | European Alps |
| Erschbamer & Caccianiga | 2016 | Glacier forelands: Lessons of plant population and community development                                                                                                                                | Progress in Botany                            | European Alps |
| Schuhmann et al.        | 2016 | Factors affecting primary succession of glacier foreland vegetation in the European Alps                                                                                                                | Alpine Botany                                 | European Alps |
| Tampuccini et al.       | 2015 | Plant and arthropod colonisation of a glacier foreland in a peripheral mountain range                                                                                                                   | Biodiversity                                  | European Alps |
| Carlson et al.          | 2014 | Accounting for tree line shift, glacier retreat and primary succession in mountain plant distribution models                                                                                            | Diversity and Distributions                   | European Alps |
| D'Amico et al.          | 2014 | Vegetation influence on soil formation rate in a proglacial chronosequence (Lys Glacier, NW Italian Alps)                                                                                               | Catena                                        | European Alps |
| Fischer                 | 2013 | Long-term glacier monitoring at the LTER test sites Hintereisferner, Kesselwandferner and Jamtalferner and other glaciers in Tyrol: a source of ancillary information for biological succession studies | Plant Ecology & Diversity                     | European Alps |
| Burga et al.            | 2010 | Plant succession and soil development on the foreland of the Morteratsch glacier (Pontresina, Switzerland): Straight forward or chaotic?                                                                | Flora                                         | European Alps |
| Robbins & Matthews      | 2010 | Regional variation in successional trajectories and rates of vegetation change on glacier forelands in south-central Norway                                                                             | Arctic, Antarctic, and Alpine Research        | Scandinavia   |
| Jones & Del Moral       | 2009 | Dispersal and establishment both limit colonization during primary succession on a glacier foreland                                                                                                     | Plant Ecology                                 | N-America     |
| Dolezal et al.          | 2008 | Primary succession following deglaciation at Koryto Glacier valley, Kamchatka                                                                                                                           | Arctic, Antarctic, and Alpine Research        | Asia          |
| Raffl et al.            | 2006 | Vegetation succession pattern and diversity changes in a glacier valley, Central Alps, Austria                                                                                                          | Arctic, Antarctic, and Alpine Research        | European Alps |

| Author               | Year | Title                                                                                                                    | Journal                                                                               | Location      |
|----------------------|------|--------------------------------------------------------------------------------------------------------------------------|---------------------------------------------------------------------------------------|---------------|
| Mizuno               | 2005 | Glacial fluctuation and vegetation succession on Tyndall Glacier, Mt Kenya                                               | Mountain Research and Development                                                     | Africa        |
| Caccianiga & Andreis | 2004 | Pioneer herbaceous vegetation on glacier forelands in the Italian Alps                                                   | Phytocoenologia                                                                       | European Alps |
| Raffl & Erschbamer   | 2004 | Comparative vegetation analyses of two transects crossing a characteristic glacier valley in the Central Alps            | Phytocoenologia                                                                       | European Alps |
| Kaufmann & Raffl     | 2002 | Diversity in primary succession: the chronosequence of a glacier foreland                                                | Global Mountain Biodiversity: A Global Assessment (book)                              | European Alps |
| Andreis et al.       | 2001 | Vegetation and environmental factors during primary succession on glacier forelands: some outlines from the Italian Alps | Plant Biosystems - An International Journal Dealing with all Aspects of Plant Biology | European Alps |
| Burga                | 1999 | Vegetation development on the glacier forefield Morteratsch (Switzerland)                                                | Applied Vegetation Science                                                            | European Alps |
| Frenot et al.        | 1998 | Primary succession on glacier forelands in the subantarctic Kerguelen Islands                                            | Journal of Vegetation Science                                                         | Antarctic     |
| Mizuno               | 1998 | Succession processes of alpine vegetation in response to glacial fluctuations of Tyndall Glacier, Mt. Kenya, Kenya       | Arctic and Alpine Research                                                            | Africa        |
| Vetaas               | 1994 | Primary succession of plant assemblages on a glacier foreland-Bodalsbreen, southern Norway                               | Journal of Biogeography                                                               | Scandinavia   |
| Matthews & Whittaker | 1987 | Vegetation succession on the Storbreen glacier foreland, Jotunheimen, Norway: a review                                   | Arctic and Alpine Research                                                            | Scandinavia   |

Table S2: Meteorological and snow observation stations. Measured variables: P = Precipitation, T = Temperature, WS = Wind speed, H = Humidity, R = Radiation, SD = Snow depth (1 Autonomous Province of Bozen/Bolzano - South Tyrol; 2 Institute of Atmospheric and Cryospheric Sciences, University of Innsbruck).

| Station                | Acronym | Elevation [m a.s.l.] | Latitude | Longitude | Measured variables | Resolution      | Temporal coverage | Valley  | Provider |
|------------------------|---------|----------------------|----------|-----------|--------------------|-----------------|-------------------|---------|----------|
| Madtrisch              | -       | 2825                 | 46.4938  | 10.6144   | P, T, WS, H, R, SD | 10-min          | 2000-2020         | Sulden  | 1        |
| Rossbänke              | -       | 2255                 | 46.46935 | 10.81944  | T, H, WS, SD       | 10-min          | 2015-2020         | Ulten   | 1        |
| Zufall                 | -       | 2265                 | 46.48129 | 10.67802  | SD                 | Weekly (manual) | 2004-2020         | Martell | 1        |
| Zufritt                | -       | 1851                 | 46.50906 | 10.72507  | P, T, SD           | Daily           | 1980-2020         | Martell | 1        |
| Hintermartell          | HI      | 1720                 | 46.5169  | 10.7269   | P, T, WS, H, R     | 10-min          | 2009-2020         | Martell | 1        |
| Langenferner-Felsköpfl | LA      | 2967                 | 46.47245 | 10.61391  | P, T, WS, H, R     | 10-min          | 2012-2020         | Martell | 2        |
| Schöntaufspitze        | SC      | 3328                 | 46.5029  | 10.6286   | T, WS              | 10-min          | 1998-2020         | Martell | 1        |
| Sulden                 | SU      | 1907                 | 46.5159  | 10.5953   | P, T, WS, H, R     | 10-min          | 1987-2020         | Sulden  | 1        |
| Ulten Weißbrunn        | UL      | 1900                 | 46.4868  | 10.8318   | P, T, H, R         | 10-min          | 1987-2020         | Ulten   | 1        |

| Station         | Acronym | Elevation<br>[m a.s.l.] | Latitude | Longitude | Measured<br>variables | Resolution | Temporal<br>coverage | Valley | Provider |
|-----------------|---------|-------------------------|----------|-----------|-----------------------|------------|----------------------|--------|----------|
| Weißbrunnspitze | WE      | 3252                    | 46.494   | 10.774    | T, H, WS              | 10-min     | 2012-2020            | Ulten  | 1        |

Table S3: Overview of data sources considered for the reconstruction of the glacier terminus position, necessary for the determination of the time of deglaciation of the vegetation plots, in the Martell valley (Fürkeleferner <sup>FF</sup>, ZF: Zufallferner <sup>ZF</sup>, Langenferner <sup>LF</sup>). The years refer to the time of the glacier survey/illustration in the respective data source.

| Martell valley                |                                                                                                                                                                                 |
|-------------------------------|---------------------------------------------------------------------------------------------------------------------------------------------------------------------------------|
| Year                          | Data source                                                                                                                                                                     |
| LIA <sup>FF, ZF</sup>         | Morphological mapping: <i>based on field observations, ALS-DTM (2019) and orthophotos</i>                                                                                       |
| 1870/71 <sup>FF, ZF</sup>     | Map: <i>3<sup>rd</sup> Federal survey, 5445/2; 1:25.000, KuK Military Geographical Institute (Austrian Federal Office of Surveying and Metrology - BEV, Austria)</i>            |
| 1887 <sup>FF, ZF</sup>        | Map: <i>3<sup>rd</sup> Federal survey (reamb.), 5445/2; 1:25.000. KuK Military Geographical Institute (Austrian Federal Office of Surveying and Metrology - BEV, Austria)</i>   |
| 1897 <sup>FF, ZF</sup>        | Morphological mapping: <i>based on field observations, ALS-DTM (2019) and literature study (Richter 1889; Finsterwalder 1890; N.N 1891; Finsterwalder 1896; Fritzsich 1900)</i> |
| 1911 <sup>FF, ZF, LF</sup>    | Map: <i>4<sup>th</sup> Federal survey, 5445/2; 1:25.000, KuK Military Geographical Institute (Austrian Federal Office of Surveying and Metrology - BEV, Austria)</i>            |
| 1945 <sup>FF, ZF, LF</sup>    | Aerial image ( <i>Italian Military Geographic Institute - IGMI, Italy</i> )                                                                                                     |
| 1954-56 <sup>FF, ZF</sup>     | Aerial image ( <i>Autonomous Province of Bozen/Bolzano, South Tyrol, Italy</i> )                                                                                                |
| 1959-62 <sup>FF, ZF, LF</sup> | Map: <i>Carta d'Italia, Monte Cevetale F°9 III N.E., 1:25.000 Istituto Geografico Militare Italiano (1963) (Archive: Department of Geography, University of Innsbruck)</i>      |
| 1969 <sup>FF, ZF, LF</sup>    | Aerial image ( <i>Italian Military Geographic Institute - IGMI, Italy</i> )                                                                                                     |
| 1985 <sup>FF, ZF, LF</sup>    | Aerial image ( <i>Autonomous Province of Bozen/Bolzano, South Tyrol, Italy</i> )                                                                                                |
| 1992-97 <sup>FF, ZF, LF</sup> | Aerial image ( <i>Autonomous Province of Bozen/Bolzano, South Tyrol, Italy</i> )                                                                                                |
| 1999 <sup>FF, ZF, LF</sup>    | Aerial image ( <i>Autonomous Province of Bozen/Bolzano, South Tyrol, Italy</i> )                                                                                                |
| 2003 <sup>FF, ZF, LF</sup>    | Aerial image ( <i>Autonomous Province of Bozen/Bolzano, South Tyrol, Italy</i> )                                                                                                |
| 2005 <sup>FF, ZF, LF</sup>    | ALS-DTM ( <i>Autonomous Province of Bozen/Bolzano, South Tyrol, Italy</i> )                                                                                                     |
| 2006 <sup>FF, ZF, LF</sup>    | Aerial image ( <i>Autonomous Province of Bozen/Bolzano, South Tyrol, Italy</i> )                                                                                                |
| 2008 <sup>FF, ZF, LF</sup>    | Aerial image ( <i>Autonomous Province of Bozen/Bolzano, South Tyrol, Italy</i> )                                                                                                |
| 2011 <sup>FF, ZF, LF</sup>    | ALS-DTM ( <i>Autonomous Province of Bozen/Bolzano, South Tyrol funded project MALS</i> )                                                                                        |
| 2013 <sup>FF, ZF, LF</sup>    | ALS-DTM ( <i>Department of Atmospheric and Cryospheric Sciences, University of Innsbruck; (Galos et al., 2015)</i> )                                                            |
| 2017 <sup>FF, ZF, LF</sup>    | Aerial image ( <i>Google Earth</i> )                                                                                                                                            |
| 2019 <sup>FF, ZF, LF</sup>    | ALS-DTM ( <i>Department of Physical Geography, Catholic University of Eichstätt-Ingolstadt; DFG &amp; FWF-funded project SEHAG</i> )                                            |

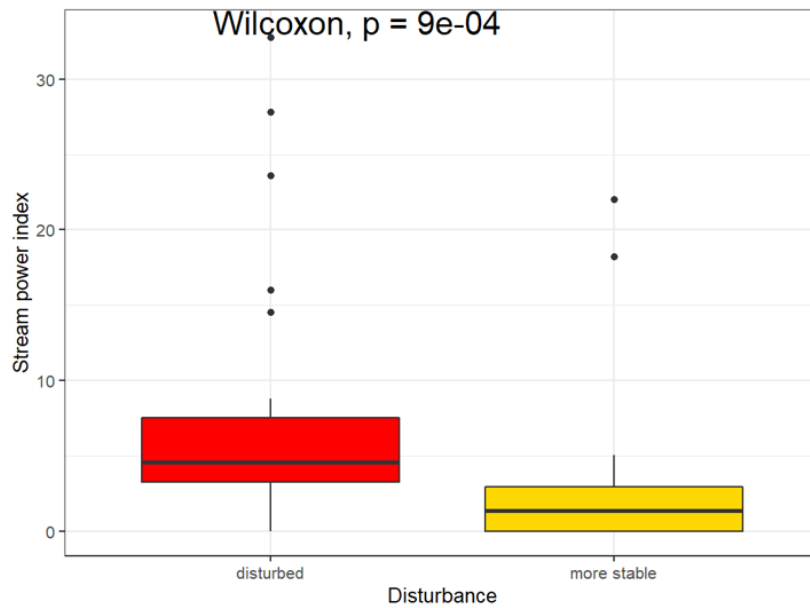

**Figure S2: Boxplot of the Stream power index (SPI) (log-transformed for better visibility) for disturbed (red) and more stable (yellow) plots. Wilcoxon rank tests are performed for analysis of significance of difference between disturbance groups.**

Table S4: Sources for livestock numbers in Martell.

| Year | Source                                                                                                                       |
|------|------------------------------------------------------------------------------------------------------------------------------|
| 1869 | Graf Belrupt (1871)                                                                                                          |
| 1900 | Tasser et al. (2012)                                                                                                         |
| 1910 | Tasser et al. (2012)                                                                                                         |
| 1930 | Fischer (1974)                                                                                                               |
| 1955 | Fischer (1974)                                                                                                               |
| 1959 | Fischer (1974)                                                                                                               |
| 1970 | Fischer (1974)                                                                                                               |
| 1982 | Landesinstitut für Statistik, Istituto Centrale Di Statistica, Central Institute of Statistics, Istat, and I.S.T.A.T. (1984) |
| 1990 | astat (1990)                                                                                                                 |
| 2000 | Autonome Provinz Bozen-Südtirol, Landesinstitu für Statistik - ASTAT (2013)                                                  |
| 2010 | (Autonome Provinz Bozen-Südtirol, Landesinstitu für Statistik - ASTAT, 2013)                                                 |

Table S5: Result of the varimax rotated PCA with the results for the different components (RC) with the SS loadings (eigenvalues), proportion variance (how much of the overall variance the component accounts for), proportion explained (relative amount of variance explained) and the cumulative values for the proportion variance and proportion explained, sorted concerning the proportion of variance explained.

|                            | RC1   | RC2  | RC3  | RC4  | RC5  |
|----------------------------|-------|------|------|------|------|
| <b>SS loadings</b>         | 11.66 | 4.52 | 4.33 | 3.25 | 2.67 |
| <b>Proportion Variance</b> | 0.35  | 0.14 | 0.13 | 0.10 | 0.08 |
| <b>Cumulative Variance</b> | 0.35  | 0.49 | 0.62 | 0.72 | 0.80 |

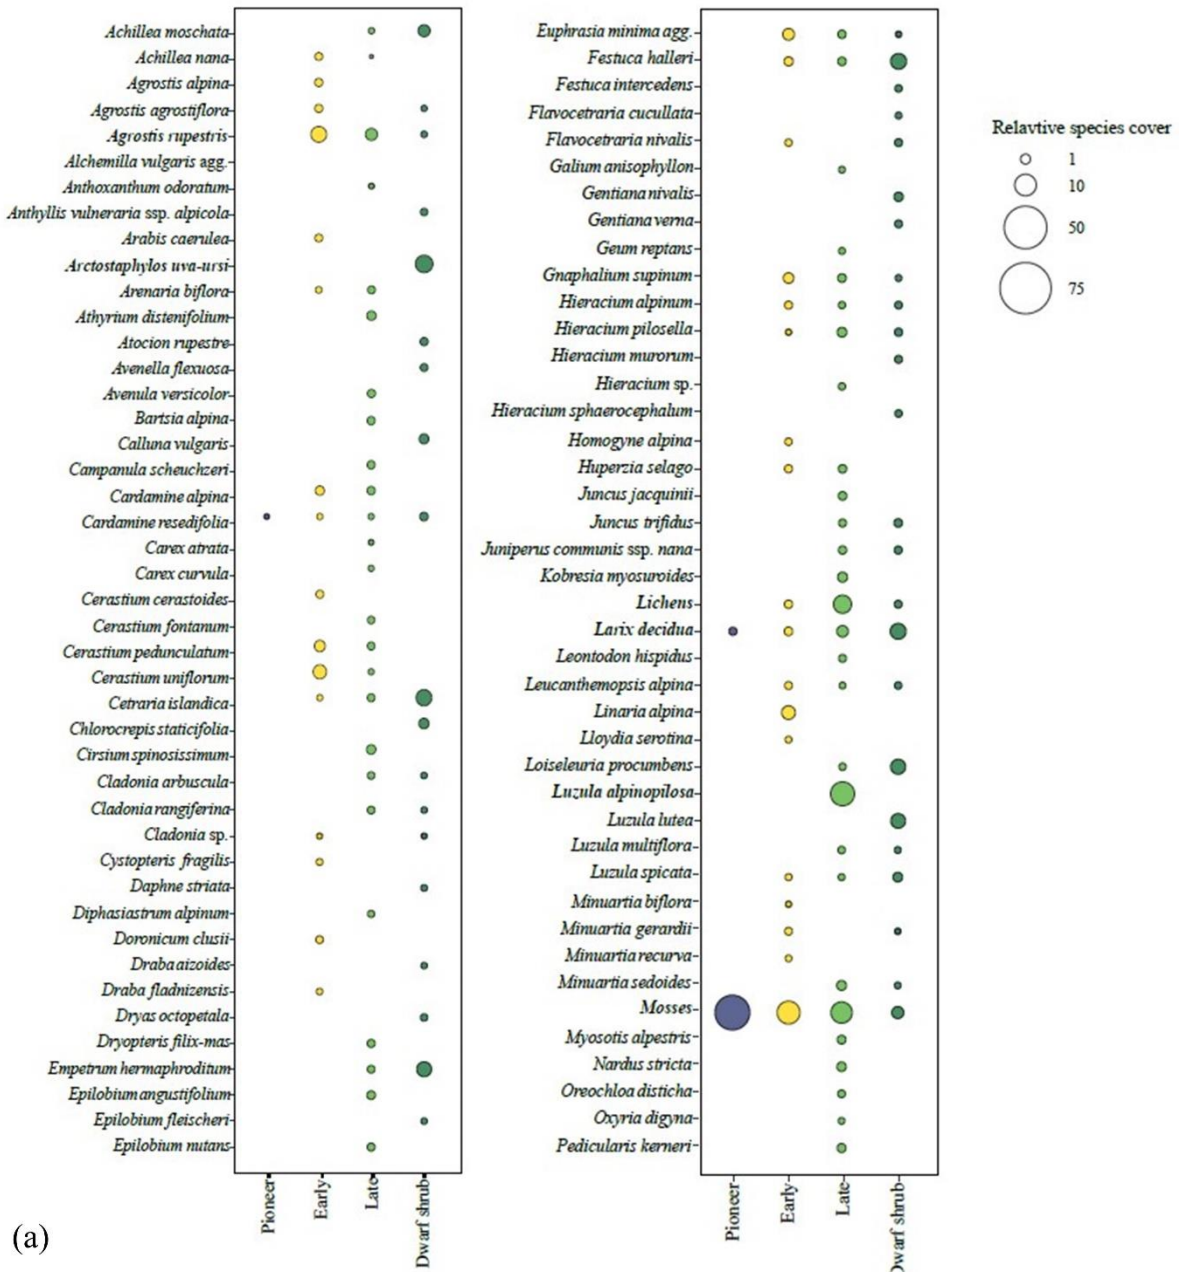



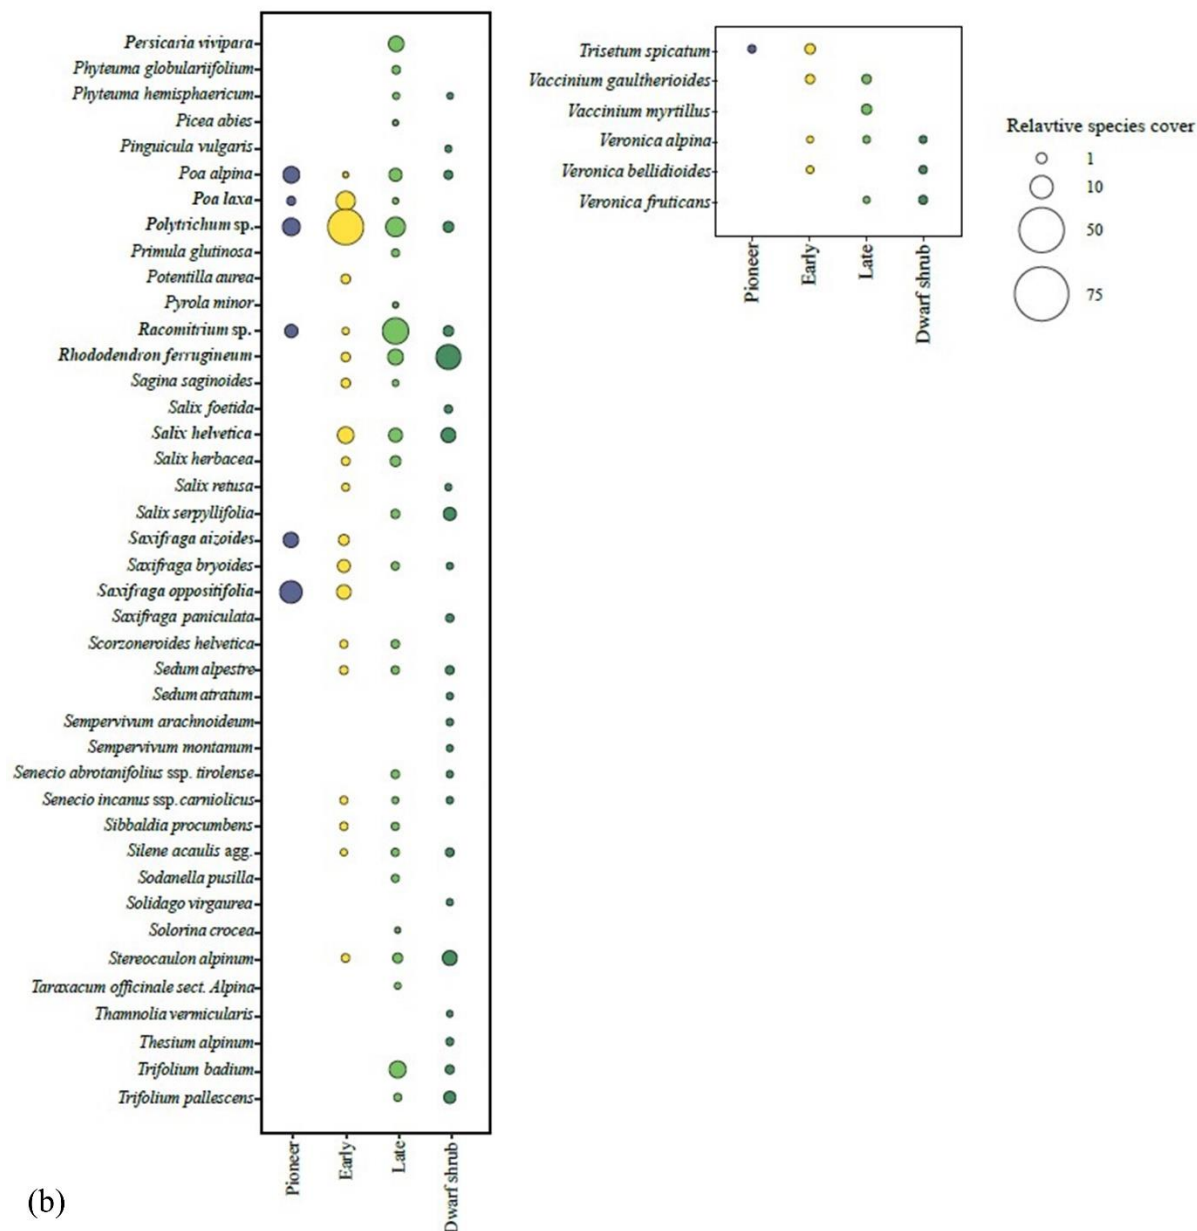

Figure S3a and b: Species list with the species assigned to the four main successional stages (Pioneer = pioneer stage, Early = early successional stage, Late = late successional stage (incl. both groups), Dwarf sh.(shrub) = dwarf shrub stage). The circles are according to the relative cover of each species in each stage and the different colours also indicate the different stages.

Table S6: Species list with the species assigned to the four main successional stages (Pioneer = pioneer stage, Early = early successional stage, Late = late successional stage (incl. both groups), Dwarf sh.(shrub) = dwarf shrub stage). The circles are according to the relative cover of each species in each stage and the different colours also indicate the different stages species with relative cover > 4 % are highlighted in bold.

| Species                         | Pioneer stage | Early stage | Late stage | Dwarf-shrub stage |
|---------------------------------|---------------|-------------|------------|-------------------|
| <i>Achillea moschata</i>        |               |             | 0.17       | 2.37              |
| <i>Achillea nana</i>            |               | 0.45        | 0.78       |                   |
| <i>Agrostis alpina</i>          |               | 0.60        |            |                   |
| <i>Agrostis agrostiflora</i>    |               | 0.55        |            | 0.18              |
| <i>Agrostis rupestris</i>       |               | 4.83        | 2.37       | 0.19              |
| <i>Alchemilla vulgaris</i> agg. |               |             |            |                   |

|                                                  |      |      |             |
|--------------------------------------------------|------|------|-------------|
| <i>Anthoxanthum odoratum</i>                     |      | 0.12 |             |
| <i>Anthyllis vulneraria</i> ssp. <i>alpicola</i> |      |      | 0.40        |
| <i>Arabis caerulea</i>                           | 0.47 |      |             |
| <b><i>Arctostaphylos uva-ursi</i></b>            |      |      | <b>6.48</b> |
| <i>Arenaria biflora</i>                          | 0.19 | 0.50 |             |
| <i>Athyrium distentifolium</i>                   |      | 0.96 |             |
| <i>Atocion rupestre</i>                          |      |      | 0.53        |
| <i>Avenella flexuosa</i>                         |      |      | 0.49        |
| <i>Avenula versicolor</i>                        |      | 0.60 |             |
| <i>Bartsia alpina</i>                            |      | 0.62 |             |
| <i>Calluna vulgaris</i>                          |      |      | 1.36        |
| <i>Campanula scheuchzeri</i>                     |      | 0.64 |             |
| <i>Cardamine alpina</i>                          | 1.00 | 0.67 |             |
| <i>Cardamine resedifolia</i>                     | 0.12 | 0.14 | 0.76        |
| <i>Carex atrata</i>                              |      | 0.12 |             |
| <i>Carex curvula</i>                             |      | 0.17 |             |
| <i>Cerastium cerastoides</i>                     | 0.56 |      |             |
| <i>Cerastium fontanum</i>                        |      | 0.45 |             |
| <i>Cerastium pedunculatum</i>                    | 1.94 | 0.53 |             |
| <i>Cerastium uniflorum</i>                       | 3.63 | 0.16 |             |
| <b><i>Cetraria islandica</i></b>                 | 0.17 | 0.53 | <b>5.52</b> |
| <i>Chlorocrepis staticifolia</i>                 |      |      | 1.56        |
| <i>Cirsium spinosissimum</i>                     |      | 1.13 |             |
| <i>Cladonia arbuscula</i>                        |      | 0.42 | 0.22        |
| <i>Cladonia rangiferina</i>                      |      | 0.43 | 0.18        |
| <i>Cladonia</i> sp.                              | 0.14 |      | 0.12        |
| <i>Cystopteris fragilis</i>                      | 0.19 |      |             |
| <i>Daphne striata</i>                            |      |      | 0.19        |
| <i>Diphasiastrum alpinum</i>                     |      | 0.28 |             |
| <i>Doronicum clusii</i>                          | 0.38 |      |             |
| <i>Draba aizoides</i>                            |      |      | 0.18        |
| <i>Draba fladnizensis</i>                        | 0.17 |      |             |
| <i>Dryas octopetala</i>                          |      |      | 0.33        |
| <i>Dryopteris filix-mas</i>                      |      | 0.48 |             |
| <b><i>Empetrum hermaphroditum</i></b>            |      | 0.39 | <b>4.13</b> |
| <i>Epilobium angustifolium</i>                   |      | 0.67 |             |
| <i>Epilobium fleischeri</i>                      |      |      | 0.16        |
| <i>Epilobium nutans</i>                          |      | 0.46 |             |
| <i>Erigeron uniflorus</i>                        |      |      |             |
| <i>Euphrasia minima</i> agg.                     | 1.72 | 0.47 | 0.12        |
| <i>Festuca halleri</i>                           | 0.69 | 0.50 | 4.28        |
| <i>Festuca intercedens</i>                       |      |      | 0.26        |
| <i>Flavocetraria cucullata</i>                   |      |      | 0.18        |
| <i>Flavocetraria nivalis</i>                     | 0.25 |      | 0.38        |
| <i>Galium anisophyllum</i>                       |      | 0.16 |             |
| <i>Gentiana nivalis</i>                          |      |      | 0.76        |
| <i>Gentiana verna</i>                            |      |      | 0.35        |
| <i>Geum reptans</i>                              |      | 0.18 |             |
| <i>Gnaphalium supinum</i>                        | 1.22 | 0.56 | 0.16        |

|                                    |              |              |              |              |
|------------------------------------|--------------|--------------|--------------|--------------|
| <i>Hieracium alpinum</i>           |              | 0.40         | 0.24         | 0.32         |
| <i>Hieracium pilosella</i>         |              | 0.12         | 0.89         | 0.43         |
| <i>Hieracium murorum</i>           |              |              |              | 0.37         |
| <i>Hieracium sp.</i>               |              |              | 0.25         |              |
| <i>Hieracium sphaerocephalum</i>   |              |              |              | 0.28         |
| <i>Homogyne alpina</i>             |              | 0.27         |              |              |
| <i>Huperzia selago</i>             |              | 0.42         | 0.49         |              |
| <i>Juncus jacquinii</i>            |              |              | 0.52         |              |
| <i>Juncus trifidus</i>             |              |              | 0.38         | 0.53         |
| <i>Juniperus communis ssp.nana</i> |              |              | 0.47         | 0.42         |
| <i>Kobresia myosuroides</i>        |              |              | 0.99         |              |
| <b>Lichens</b>                     |              | 0.47         | <b>6.29</b>  | 0.37         |
| <i>Larix decidua</i>               | 0.43         | 0.56         | 1.63         | 4.36         |
| <i>Leontodon hispidus</i>          |              |              | 0.35         |              |
| <i>Leucanthemopsis alpina</i>      |              | 0.37         | 0.17         | 0.27         |
| <i>Linaria alpina</i>              |              | 2.82         |              |              |
| <i>Lloydia serotina</i>            |              | 0.16         |              |              |
| <i>Loiseleuria procumbens</i>      |              |              | 0.27         | 3.72         |
| <b>Luzula alpinopilosa</b>         |              |              | <b>12.95</b> |              |
| <i>Luzula lutea</i>                |              |              |              | 3.52         |
| <i>Luzula multiflora</i>           |              |              | 0.29         | 0.18         |
| <i>Luzula spicata</i>              |              | 0.19         | 0.18         | 0.88         |
| <i>Minuartia biflora</i>           |              | 0.11         |              |              |
| <i>Minuartia gerardii</i>          |              | 0.34         |              | 0.12         |
| <i>Minuartia recurva</i>           |              | 0.15         |              |              |
| <i>Minuartia sedoides</i>          |              |              | 0.95         | 0.16         |
| <b>Mosses</b>                      | <b>31.49</b> | <b>11.42</b> | <b>9.59</b>  | 1.93         |
| <i>Myosotis alpestris</i>          |              |              | 0.59         |              |
| <i>Nardus stricta</i>              |              |              | 0.78         |              |
| <i>Oreochloa disticha</i>          |              |              | 0.34         |              |
| <i>Oxyria digyna</i>               |              |              | 0.16         |              |
| <i>Pedicularis kernerii</i>        |              |              | 0.63         |              |
| <b>Persicaria vivipara</b>         |              |              | <b>4.48</b>  |              |
| <i>Phyteuma globulariifolium</i>   |              |              | 0.58         |              |
| <i>Phyteuma hemisphaericum</i>     |              |              | 0.24         | 0.16         |
| <i>Picea abies</i>                 |              |              | 0.12         |              |
| <i>Pinguicula vulgaris</i>         |              |              |              | 0.25         |
| <i>Poa alpina</i>                  | 5.56         | 0.12         | 2.67         | 0.69         |
| <b>Poa laxa</b>                    | 0.78         | <b>7.92</b>  | 0.14         |              |
| <b>Polytrichum sp.</b>             | <b>6.51</b>  | <b>36.64</b> | <b>8.51</b>  | 1.44         |
| <i>Primula glutinosa</i>           |              |              | 0.45         |              |
| <i>Potentilla aurea</i>            |              | 0.94         |              |              |
| <i>Pyrola minor</i>                |              |              | 0.11         |              |
| <b>Racomitrium sp.</b>             | 2.84         | 0.29         | <b>17.58</b> | 1.31         |
| <b>Rhododendron ferrugineum</b>    |              | 0.86         | <b>4.69</b>  | <b>15.37</b> |
| <i>Sagina saginoides</i>           |              | 0.91         | 0.18         |              |
| <i>Salix foetida</i>               |              |              |              | 0.53         |
| <i>Salix helvetica</i>             |              | 5.34         | 3.21         | 3.86         |
| <i>Salix herbacea</i>              |              | 0.65         | 1.39         |              |

|                                                     |              |      |             |      |
|-----------------------------------------------------|--------------|------|-------------|------|
| <i>Salix retusa</i>                                 |              | 0.44 |             | 0.26 |
| <i>Salix serpyllifolia</i>                          |              |      | 0.77        | 2.65 |
| <i>Saxifraga aizoides</i>                           | 4.39         | 1.47 |             |      |
| <i>Saxifraga bryoides</i>                           |              | 2.51 | 0.50        | 0.25 |
| <b><i>Saxifraga oppositifolia</i></b>               | <b>11.99</b> | 3.62 |             |      |
| <i>Saxifraga paniculata</i>                         |              |      |             | 0.53 |
| <i>Scorzoneroides helvetica</i>                     |              | 0.49 | 0.59        |      |
| <i>Sedum alpestre</i>                               |              | 0.64 | 0.52        | 0.66 |
| <i>Sedum atratum</i>                                |              |      |             | 0.26 |
| <i>Sempervivum arachnoideum</i>                     |              |      |             | 0.30 |
| <i>Sempervivum montanum</i>                         |              |      |             | 0.22 |
| <i>Senecio abrotanifolius</i> ssp. <i>tirolense</i> |              |      | 0.58        | 0.26 |
| <i>Senecio incanus</i> ssp. <i>carniolicus</i>      |              | 0.45 | 0.23        | 0.29 |
| <i>Sibbaldia procumbens</i>                         |              | 0.52 | 0.46        |      |
| <i>Silene acaulis</i> agg.                          |              | 0.25 | 0.47        | 0.63 |
| <i>Sodanella pusilla</i>                            |              |      | 0.42        |      |
| <i>Solidago virgaurea</i>                           |              |      |             | 0.25 |
| <i>Solorina crocea</i>                              |              |      | 0.12        |      |
| <i>Stereocaulon alpinum</i>                         |              | 0.60 | 1.13        | 3.96 |
| <i>Taraxacum officinale</i> sect. <i>Alpina</i>     |              |      | 0.18        |      |
| <i>Thamnotia vermicularis</i>                       |              |      |             | 0.16 |
| <i>Thesium alpinum</i>                              |              |      |             | 0.43 |
| <i>Trifolium badium</i>                             |              |      | <b>5.74</b> | 0.77 |
| <i>Trifolium pallescens</i>                         |              |      | 0.45        | 2.17 |
| <i>Trisetum spicatum</i>                            | 0.32         | 0.94 |             |      |
| <i>Vaccinium gaultherioides</i>                     |              | 0.63 | 0.62        |      |
| <i>Vaccinium myrtillus</i>                          |              |      | 0.89        |      |
| <i>Veronica alpina</i>                              |              | 0.12 | 0.22        | 0.25 |
| <i>Veronica bellidioides</i>                        |              | 0.24 |             | 0.34 |
| <i>Veronica fruticans</i>                           |              |      | 0.13        | 0.49 |

## References:

astat: 4. Landwirtschaftszählung 1990 - Tabellenteil, 310 pp., 1990.

Autonome Provinz Bozen-Südtirol, Landesinstitut für Statistik - ASTAT (Ed.): 6. Landwirtschaftszählung, 6° Censimento generale dell' agricoltura 2010, Bozen, 212 pp., 2013.

Fischer, K.: Agrargeographiedes westlichen Südtirol: der Vinschgau und seine Nebentäler, Braumüller Verlag, Wien, 142–145 pp., 1974.

Galos, S. P., Klug, C., Prinz, R., Rieg, L., Dinale, R., Sailer, R., and Kaser, G.: Recent glacier changes and related contribution potential to river discharge in the Vinschgau / Val Venosta, Italian Alps, *Geografia Fisica e Dinamica Quaternaria*, 38, 143–154, <https://doi.org/10.4461/GFDQ.2015.38.13>, 2015.

Graf Belrupt, C. (Ed.): Bevölkerung und Viehstand der gefürsteten Grafschaft Tirol nach Steuergemeinden geordnet, WAGNER'sche Universitäts-Buchdruckerei, Innsbruck, 15 pp., 1871.

Landesinstitut für Statistik, Istituto Centrale Di Statistica, Central Institute of Statistics, Istat, and I.S.T.A.T.: Landwirtschaftszählung 1982: vorläufige Ergebnisse der ISTAT-Zählung: 3. Allg. Landwirtschaftszählung vom 24. Oktober 1982, Bozen, 184–187 pp., 1984.

Tasser, E., Schermer, M., Siegl, G., and Tappeiner, U.: Wir Landschaftsmacher. Vom Sein und Werden der Kulturlandschaft in Nord-, Ost- und Südtirol., Athesia, Bozen, 2012.
